# Supplementary material for: Substrate Stiffness Drives Epithelial to Mesenchymal Transition and Proliferation through the NEAT1-Wnt/β-Catenin Pathway in Liver Cancer
Source: MDPI journal article supplement (doi:10.3390/ijms222112066), 2021-11-08
Supplement: s1 [file s1]

## Supplementary information

**Table S1.** The primers in this paper

| REAGENT or RESOURCE                                                                                                 | SOURCE     | IDENTIFIER |
|---------------------------------------------------------------------------------------------------------------------|------------|------------|
| Primers                                                                                                             |            |            |
| <b>NEAT1-F:</b><br>5'GTGGCTGTTGGAGTCGGTAT3'                                                                         | This paper | N/A        |
| <b>NEAT1-R:</b><br>5'TAACAAACCACGGTCCATGA3'                                                                         | This paper | N/A        |
| <b>NEAT1_2F:</b><br>5'GTACTCTGTGATGGGGTAGTCA<br>GTCAG3'                                                             | This paper | N/A        |
| <b>NEAT1_2R:</b><br>5'GTACTCTGTGATGGGGTAGTCA<br>GTCAG3'                                                             | This paper | N/A        |
| <b>GAPDH-F:</b><br>5'GGAGCGAGATCCCTCCAAAAT3'                                                                        | This paper | N/A        |
| <b>GAPDH-R:</b><br>5' GGCTGTTGTCATACTTCTCATGG 3'                                                                    | This paper | N/A        |
| <b>NEAT1 sgRNA1 targeting sequence:</b><br>sgRNA1-F: 5'GGCTATAAAAGCAAAAGTTG3'<br>sgRNA1-R: 5'CAACTTTTGCTTTTATAGCC3' | This paper | N/A        |
| <b>NEAT1 sgRNA2 targeting sequence:</b><br>sgRNA2-F: 5'GGTCCAGCCGGAGTTAGCGA3'<br>sgRNA2-R: 5'TCGCTAACTCCGGCTGGACC3' | This paper | N/A        |
| <b>NEAT1 sgRNA3 targeting sequence:</b><br>sgRNA3-F: 5'GATTGCCTTCATAACGACTT3'<br>sgRNA3-R: 5'AAGTCGTTATGAAGGCAATC3' | This paper | N/A        |
| <b>YB1 shRNA sequence:</b><br>shRNA #1<br>5'-                                                                       | This paper | N/A        |

CCGGAGCAGACCGTAACCATTATAGCTCGAGCTATAATGGTTACGGTCT  
GCTTTTTTG-3'

5'-  
AATTCAAAAAAGCAGACCGTAACCATTATAGCTCGAGCTATAATGGTTAC  
GGTCTGCT-3'

**shRNA #2**

5'-  
CCGGCCAGTTCAAGGCAGTAAATATCTCGAGATATTTACTGCCTTGAAC  
GGTTTTTG-3'

5'-  
AATTCAAAAAACAGTTCAAGGCAGTAAATATCTCGAGATATTTACTGCCTT  
GAACTGG-3'

**shRNA #3**

5'-  
CCGGGACGGCAATGAAGAAGATAAACTCGAGTTTATCTTCTTCATTGCCG  
TCTTTTTTG-3'

5'-  
AATTCAAAAAAGACGGCAATGAAGAAGATAAACTCGAGTTTATCTTCTTCAT  
TGCCGTC-3'

---

**Table S2.** The antibodies in this paper

| REAGENT or RESOURCE                  | SOURCE                    | IDENTIFIER     |
|--------------------------------------|---------------------------|----------------|
| Antibodies                           |                           |                |
| GAPDH (human)                        | Proteintech               | Cat#10494-1-AP |
| N-Cadherin (human)                   | Cell Signaling Technology | Cat#13116      |
| E-Cadherin (human)                   | Cell Signaling Technology | Cat#3195       |
| Vimentin                             | Santa Cruz Biotechnology  | Cat#sc-373717  |
| Slug (human)                         | Cell Signaling Technology | Cat#9585       |
| CD44 (human)                         | Cell Signaling Technology | Cat#3570       |
| VEGFA (human)                        | Abcam                     | Cat#ab1316     |
| c-Myc (human)                        | Cell Signaling Technology | Cat#18583      |
| Cyclin D1 (human)                    | Cell Signaling Technology | Cat#2978       |
| PCNA (human)                         | Cell Signaling Technology | Cat#2586       |
| $\beta$ -Catenin (human)             | Cell Signaling Technology | Cat#8480       |
| p- $\beta$ -Catenin (Ser675) (human) | Cell Signaling Technology | Cat#4176       |
| RUNX2 (human)                        | Cell Signaling Technology | Cat#12556      |
| HIF-1 $\alpha$ (human)               | Cell Signaling Technology | Cat#36169      |
| p-Rb (Ser780) (human)                | ZENBIO                    | Cat#380879     |
| p-Rb (Ser807) (human)                | ZENBIO                    | Cat#382889     |
| RB1 (human)                          | Proteintech               | Cat#25628-1-AP |

|                      |                           |                |
|----------------------|---------------------------|----------------|
| MCM2 (human)         | ZENBIO                    | Cat#220635     |
| GSK3 $\beta$ (human) | ZENBIO                    | Cat#200494-2E6 |
| ZEB1 (human)         | ZENBIO                    | Cat#220860     |
| MDR1/P-gp (human)    | Proteintech               | Cat#22336-1-AP |
| ERCC1 (human)        | Proteintech               | Cat#14586-1-AP |
| YB1                  | Cell Signaling Technology | Cat#4202       |
| AKT                  | Cell Signaling Technology | Cat#4691       |
| ERK1/2               | Cell Signaling Technology | Cat#4695       |
| $\beta$ -Catenin     | Cell Signaling Technology | Cat#8480       |
| SNAIL1               | Cell Signaling Technology | Cat#3879       |
| SFPQ                 | Proteintech               | Cat#15585-1-AP |
| TGF- $\beta$ 1       | Proteintech               | Cat#21898-1-AP |

---
